# Supplementary material for: Evaluation of an early career clinical academic training programme using the CIPP model
Source: HighWire-hosted journal article supplement (doi:10.1136/bmjopen-2021-052965), 2021-11-01
Supplement: bmjopen-2021-052965supp001_data_supplement.pdf [file bmjopen-2021-052965supp001_data_supplement.pdf]

## Exit survey questions 2018

1. Do you identify as:

Male

Female

Prefer not to say

2. Had you any third level qualifications in addition to your medical degree prior to commencing the academic track for internship?

No

Yes, another undergraduate degree

Yes, a Master's degree

Yes, a PhD

Yes, other

Other (please specify)

3. Thinking back to your final year, did you apply for another intern training programme overseas (e.g. UKFP, UKAFP), or were you seriously considering applying for an overseas training programme?

Yes

No

Prefer not to say

Comments?

4. When did you do your academic rotation?

First rotation

Second rotation

Third rotation

Fourth rotation

5. How would you rate the quality of experience for the CLINICAL part of your year?

Excellent

Good

Neutral

Fair

Poor

Any comments?

6. How would you rate the quality of experience for the ACADEMIC part of your year?

Excellent

Good

Neutral

Fair

Poor

Any comments?

7. Do you feel you personally benefitted from participating in the academic track? Please outline below.

8. Please indicate your key achievements during academic internship e.g. publication, presentation, teaching, skills gained.

9. Is there anything else you would like to have achieved during your academic internship? Please outline below.

10. Is there anything you would like to see change for future academic interns?

11. Would you recommend the academic track for internship to a friend?

Yes, definitely

Yes, probably

Maybe

Probably not

Definitely not

Any comments?

12. How useful do you think the academic track will be for your future career?

Extremely useful

Very useful

Somewhat useful

Less useful

Not useful

Any comments?

13. What are your career plans for July?

14. Where do you see yourself in five years?

15. Any final comments or suggestions?

## Exit survey questions 2019

1. Please indicate when you did your academic rotation.

1<sup>st</sup> rotation

2<sup>nd</sup> rotation

3<sup>rd</sup> rotation

4<sup>th</sup> rotation

2. Please indicate any outputs you have achieved to date:

Oral presentation

Oral presentation pending

Poster presentation

Poster presentation pending

Research or other skills (please describe below)

Manuscript prepared for publication

Manuscript submitted for publication

Paper published

Award/accolade for academic achievement

Other (please specify)

3. What are your career plans for July?

BST Ireland

BST abroad

Non-scheme or locum SHO job in Ireland

Non-scheme or locum SHO job abroad

Further study

Non-clinical work

Other (please specify below)

4. Where do you see yourself in 5 years (ideal job)?

HST in Ireland

HST abroad

ICAT Scheme

Non-clinical job

Full-time PhD/MD/further study

Pure clinical research/academia

Other (please specify below)

5. Do you feel you benefitted from participating in the academic track? Please outline below

6. Would you recommend the academic track to a friend?

Yes

No

Maybe

7. Is there anything you would like to change about the academic track for future years?
